# Supplementary material for: Presynaptic cAMP-PKA-mediated potentiation induces reconfiguration of synaptic vesicle pools and channel-vesicle coupling at hippocampal mossy fiber boutons
Source: PubMed Central journal article supplement (PMC11573138; doi:10.1371/journal.pbio.3002879), 2024-11-18
Supplement: pbio.3002879.s010.pdf [file pbio.3002879.s010.pdf]

|                          | Number of particles per<br>0.1 $\mu\text{m}^2$ AZ | Mean | SD   | Median | n AZ<br>(N mice) | P value  |
|--------------------------|---------------------------------------------------|------|------|--------|------------------|----------|
| <b>Ca<sub>v</sub>2.1</b> | Control                                           | 36.2 | 12.3 | 35.0   | 130 (5)          | 0.3598   |
|                          | Forskolin                                         | 38.8 | 15.3 | 38.8   | 52 (3)           |          |
| <b>Munc13-1</b>          | Control                                           | 26.0 | 12.5 | 23.4   | 66 (3)           | 0.0689   |
|                          | Forskolin                                         | 30.1 | 13.3 | 28.0   | 52 (3)           |          |
| <b>bMunc13-2</b>         | Control                                           | 22.9 | 11.2 | 21.2   | 65 (3)           | 0.9543   |
|                          | Forskolin                                         | 22.6 | 11.6 | 21.4   | 49 (3)           |          |
|                          | <b>Mean NND (nm)</b>                              |      |      |        |                  |          |
| <b>Ca<sub>v</sub>2.1</b> | Control                                           | 26.6 | 6.2  | 25.9   | 106 (5)          | < 0.0001 |
|                          | Control <i>Null</i>                               | 40.3 | 15.0 | 36.8   | 106              |          |
|                          | Forskolin                                         | 25.0 | 4.8  | 23.9   | 52 (3)           | < 0.0001 |
|                          | Forskolin <i>Null</i>                             | 37.2 | 13.2 | 32.9   | 52               |          |
| <b>Munc13-1</b>          | Control                                           | 37.5 | 32.3 | 28.7   | 99 (3)           | < 0.0001 |
|                          | Control <i>Null</i>                               | 59.0 | 33.4 | 50.0   | 99               |          |
|                          | Forskolin                                         | 28.9 | 8.1  | 27.7   | 51 (3)           | < 0.0001 |
|                          | Forskolin <i>Null</i>                             | 37.2 | 13.2 | 32.9   | 51               |          |
| <b>bMunc13-2</b>         | Control                                           | 41.2 | 23.4 | 36.2   | 92 (3)           | < 0.0001 |
|                          | Control <i>Null</i>                               | 69.5 | 39.9 | 59.0   | 92               |          |
|                          | Forskolin                                         | 33.7 | 12.0 | 31.3   | 48 (3)           | < 0.0001 |
|                          | Forskolin <i>Null</i>                             | 59.2 | 37.1 | 52.2   | 48               |          |
