# Supplementary material for: Presynaptic cAMP-PKA-mediated potentiation induces reconfiguration of synaptic vesicle pools and channel-vesicle coupling at hippocampal mossy fiber boutons
Source: PubMed Central journal article supplement (PMC11573138; doi:10.1371/journal.pbio.3002879), 2024-11-18
Supplement: pbio.3002879.s011.pdf [file pbio.3002879.s011.pdf]

|                           | <b>Number of clusters per AZ</b> | <b>Mean</b> | <b>SD</b> | <b>Median</b> | <b>n AZ (N mice)</b> | <b>P value</b> |
|---------------------------|----------------------------------|-------------|-----------|---------------|----------------------|----------------|
| <b>Cav2.1</b>             | Control                          | 2.7         | 1.1       | 3             | 139 (5)              | 0.1595         |
|                           | Forskolin                        | 2.8         | 1.4       | 3             | 81 (3)               |                |
| <b>Munc13-1</b>           | Control                          | 2.4         | 1.1       | 2             | 119 (5)              | 0.0088         |
|                           | Forskolin                        | 3.0         | 1.4       | 3             | 78 (3)               |                |
| <b>bMunc13-2</b>          | Control                          | 1.8         | 0.7       | 2             | 60 (3)               | 0.8124         |
|                           | Forskolin                        | 1.8         | 0.9       | 2             | 51 (3)               |                |
|                           | <b>Mean NND (nm)</b>             |             |           |               |                      |                |
| <b>Munc13-1 + Cav2.1</b>  | Control                          | 97.4        | 83.0      | 70.8          | 83 (5)               | 0.0653         |
|                           | Forskolin                        | 79.1        | 67.2      | 54.2          | 69 (3)               |                |
| <b>bMunc13-2 + Cav2.1</b> | Control                          | 70.7        | 49.2      | 61.8          | 53 (3)               | 0.5943         |
|                           | Forskolin                        | 73.8        | 52.0      | 62.4          | 44 (3)               |                |
|                           | <b>Mean WPD (nm)</b>             |             |           |               |                      |                |
| <b>Munc13-1 + Cav2.1</b>  | Control                          | 51.2        | 24.2      | 45.3          | 110 (5)              | 0.0034         |
|                           | Forskolin                        | 40.3        | 12.8      | 38.7          | 85 (3)               |                |
| <b>bMunc13-2 + Cav2.1</b> | Control                          | 51.6        | 19.2      | 49.0          | 94 (3)               | 0.6687         |
|                           | Forskolin                        | 52.2        | 16.1      | 49.1          | 60 (3)               |                |
