# Supplementary material for: Presynaptic cAMP-PKA-mediated potentiation induces reconfiguration of synaptic vesicle pools and channel-vesicle coupling at hippocampal mossy fiber boutons
Source: PubMed Central journal article supplement (PMC11573138; doi:10.1371/journal.pbio.3002879), 2024-11-18
Supplement: pbio.3002879.s012.pdf [file pbio.3002879.s012.pdf]

|                          | <b>Number of clusters per AZ</b> | <b>Mean</b> | <b>SD</b> | <b>Median</b> | <b>n AZ (N mice)</b> |
|--------------------------|----------------------------------|-------------|-----------|---------------|----------------------|
| <b>Munc13-1</b>          | Control                          | 2.4         | 1.1       | 2             | 62 (3)               |
|                          | H-89                             | 2.6         | 1.4       | 2             | 52 (3)               |
|                          | H-89 + Forskolin                 | 2.4         | 1.3       | 2             | 44 (3)               |
|                          | <b>Mean NND (nm)</b>             |             |           |               |                      |
| <b>Munc13-1 + Cav2.1</b> | Control                          | 97.4        | 83.0      | 70.8          | 83 (5)               |
|                          | H-89                             | 120.0       | 81.4      | 102.5         | 38 (3)               |
|                          | H-89 + Forskolin                 | 136.5       | 110.7     | 92.8          | 31 (3)               |
|                          | <b>Mean WPD (nm)</b>             |             |           |               |                      |
| <b>Munc13-1 + Cav2.1</b> | Control                          | 47.3        | 20.6      | 44.4          | 92 (5)               |
|                          | H-89                             | 78.4        | 36.9      | 73.0          | 52 (3)               |
|                          | H-89 + Forskolin                 | 51.2        | 26.9      | 44.9          | 44(3)                |
